# Supplementary material
Source: PubMed Central journal article supplement (PMC10809954)

## Discrimination of PS model

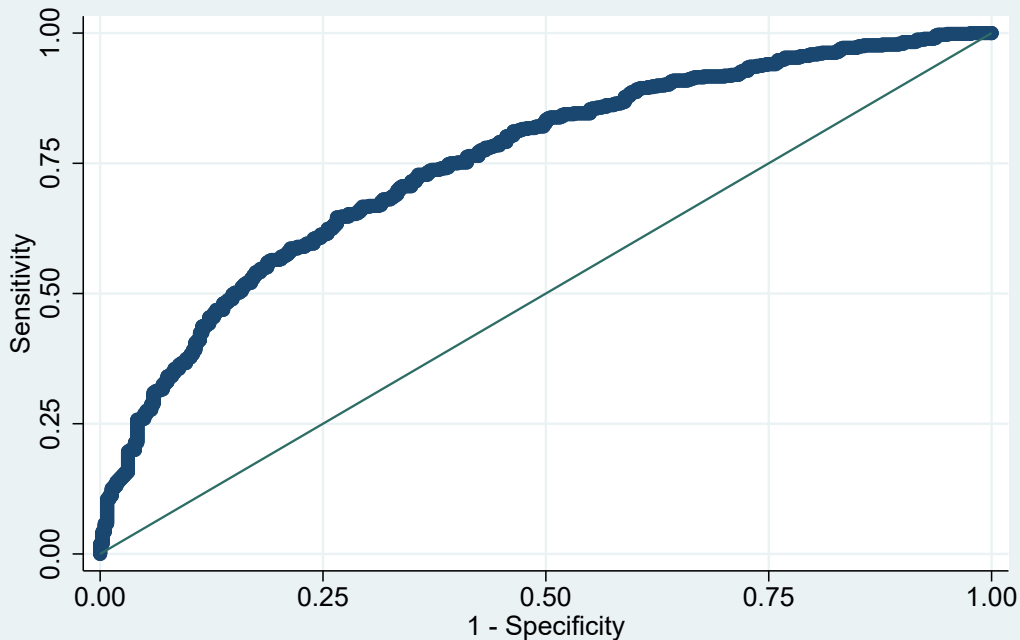

Area under ROC curve = 0.752 (bootstrapped 95% CI: 0.721-0.782)

Supplement: NIHMS1938058-supplement-1.pdf [file NIHMS1938058-supplement-1.pdf]

## Calibration of PS model

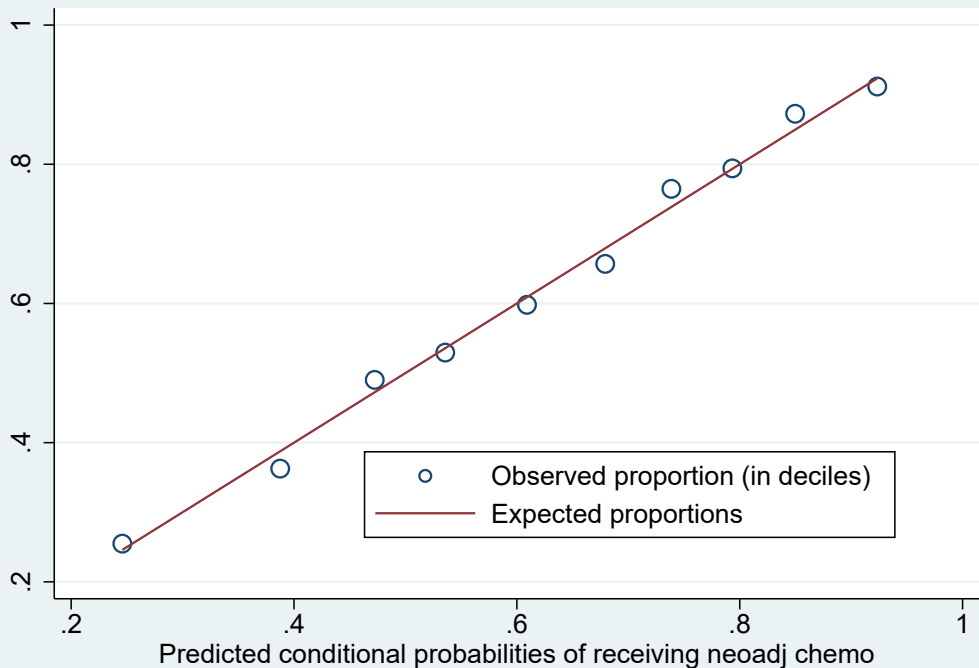

Supplement: NIHMS1938058-supplement-2.pdf [file NIHMS1938058-supplement-2.pdf]

## PS distribution before PS matching

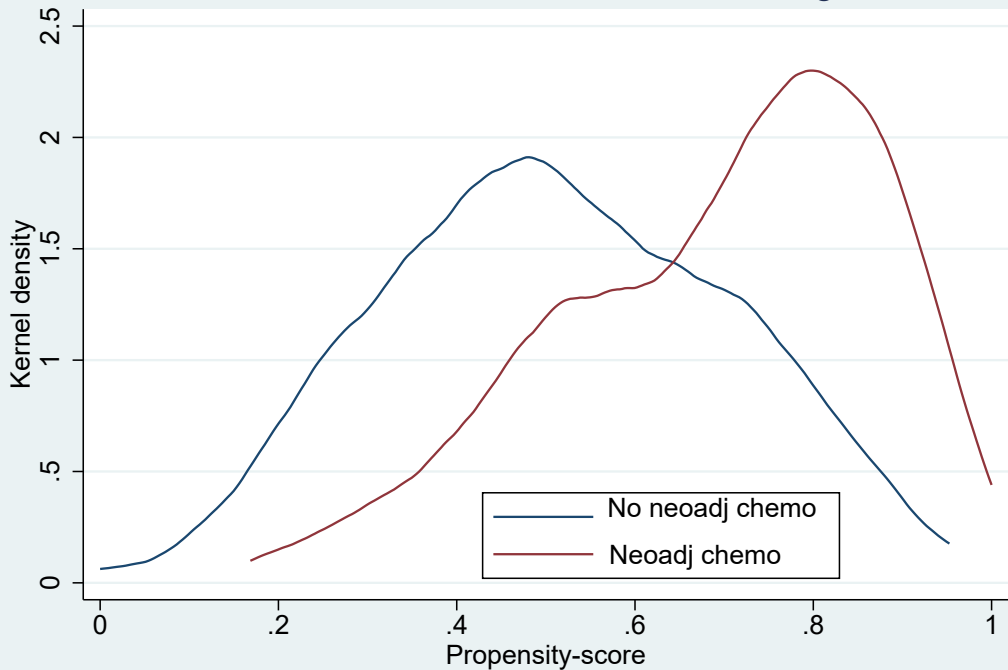

Supplement: NIHMS1938058-supplement-3.pdf [file NIHMS1938058-supplement-3.pdf]

## PS distribution after 1:2 PS matching

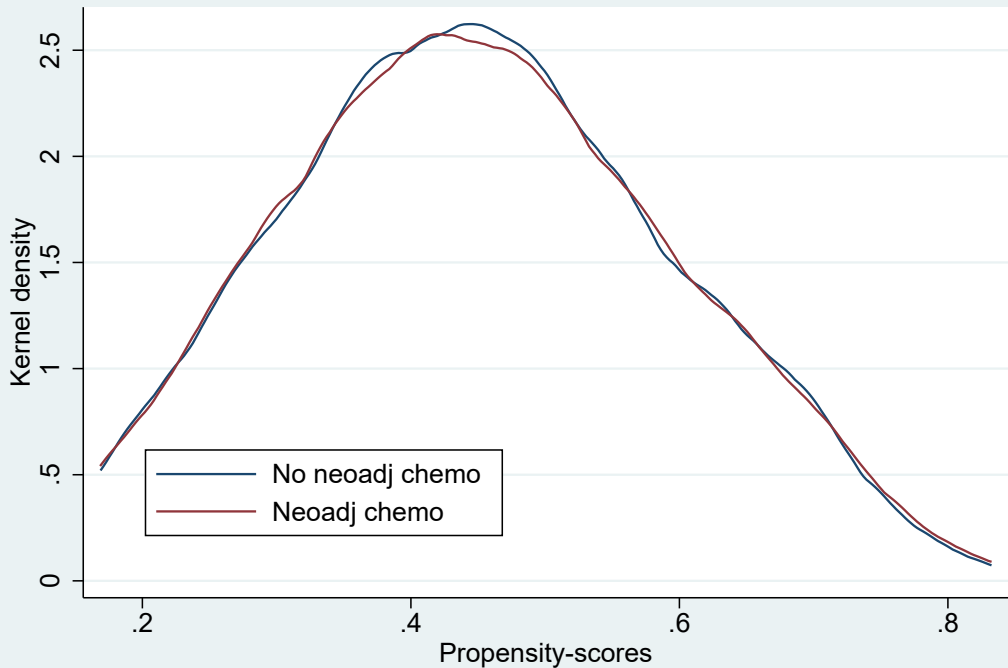

Supplement: NIHMS1938058-supplement-4.pdf [file NIHMS1938058-supplement-4.pdf]

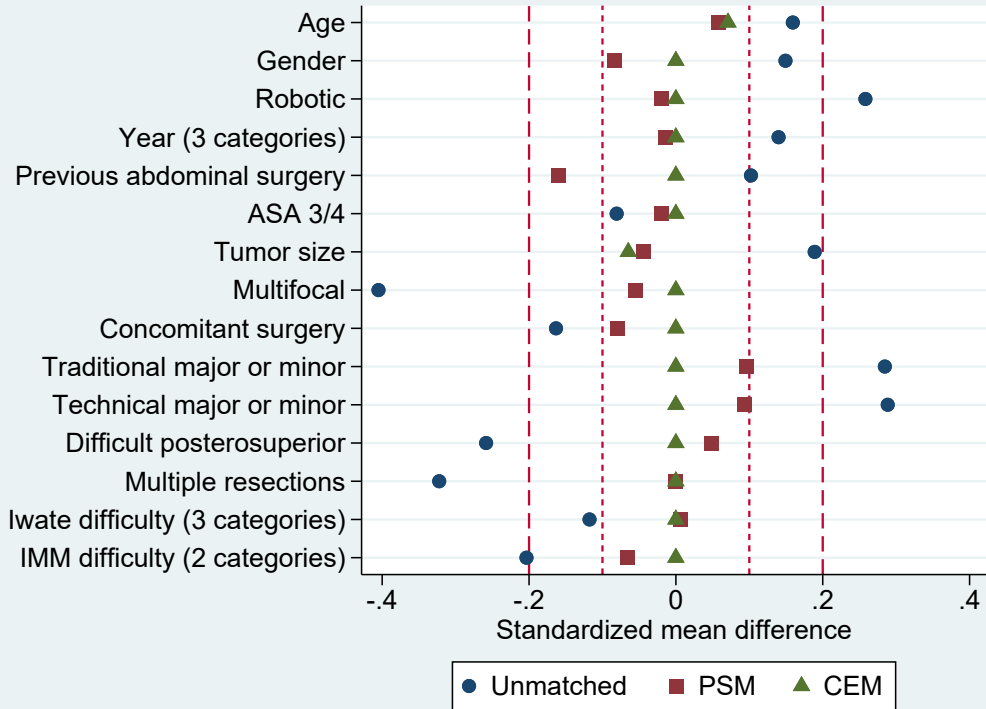

Supplement: NIHMS1938058-supplement-5.pdf [file NIHMS1938058-supplement-5.pdf]

# Distribution of cases stratified by year

## Overall cohort

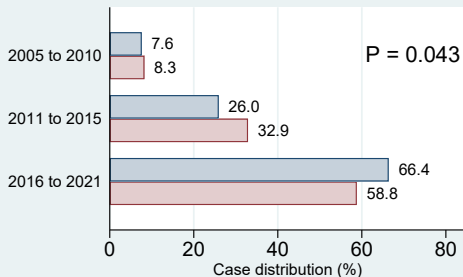

## 1:2 PSM cohort

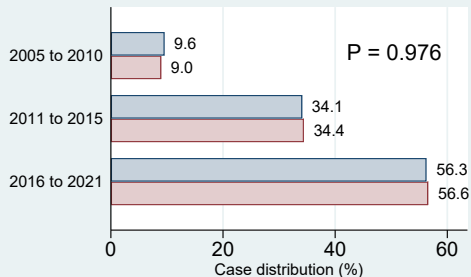

## 1:1 CEM cohort

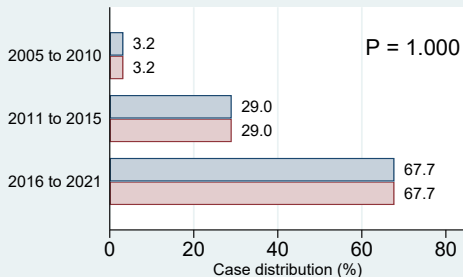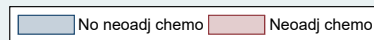

Supplement: NIHMS1938058-supplement-6.pdf [file NIHMS1938058-supplement-6.pdf]
